# Supplementary material for: A modeling and machine learning approach to ECG feature engineering for the detection of ischemia using pseudo-ECG
Source: PubMed Central journal article supplement (PMC6690680; doi:10.1371/journal.pone.0220294), 2019-08-12
Supplement: pone.0220294.s002.pdf [file pone.0220294.s002.pdf]

## Supplementary figures

The figures provided in this section complement the results presented in the main text and give further support to the arguments given in the discussion.

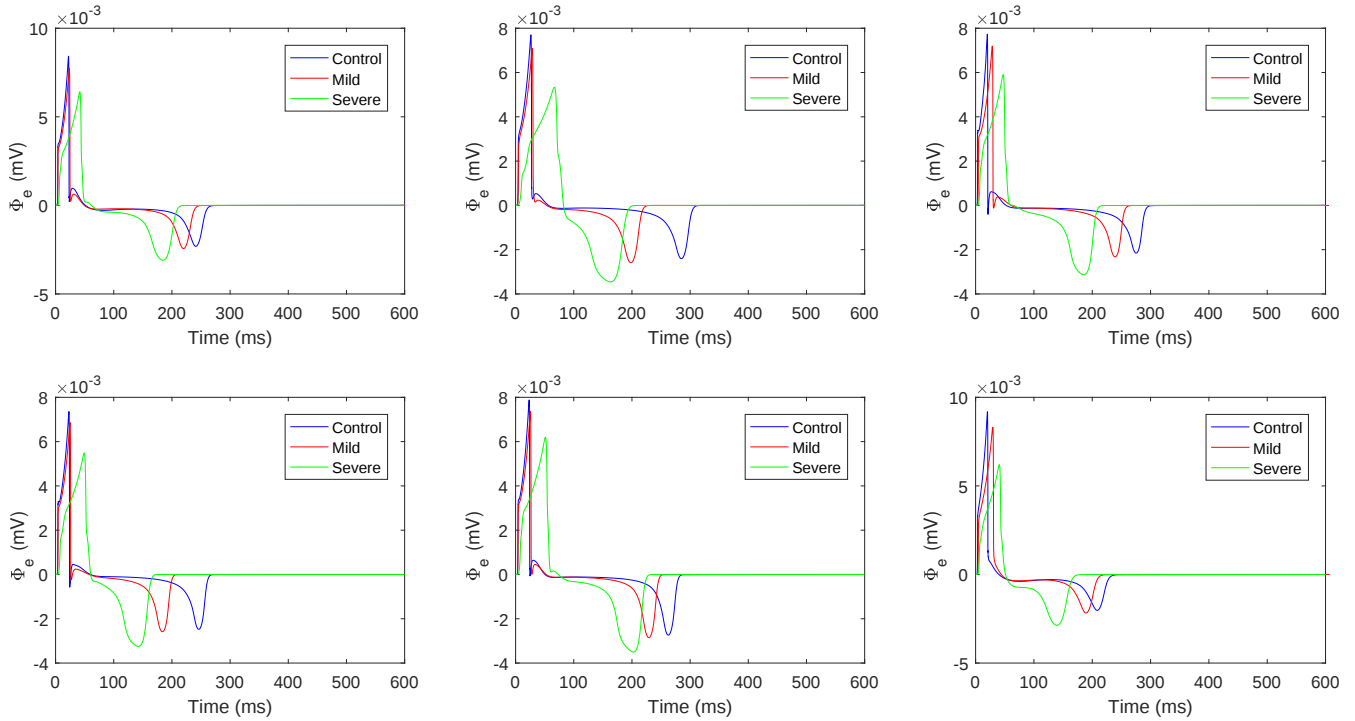

**Fig 1. Representative examples of pECG calculated from TP06 cables of cells.** Each figure presents the three pECGs calculated with a single model using the Control, Mild and Severe ischemic parameters. These correspond to the simulations made with a full ischemic cable. The traces obtained for the ORd cables were largely similar

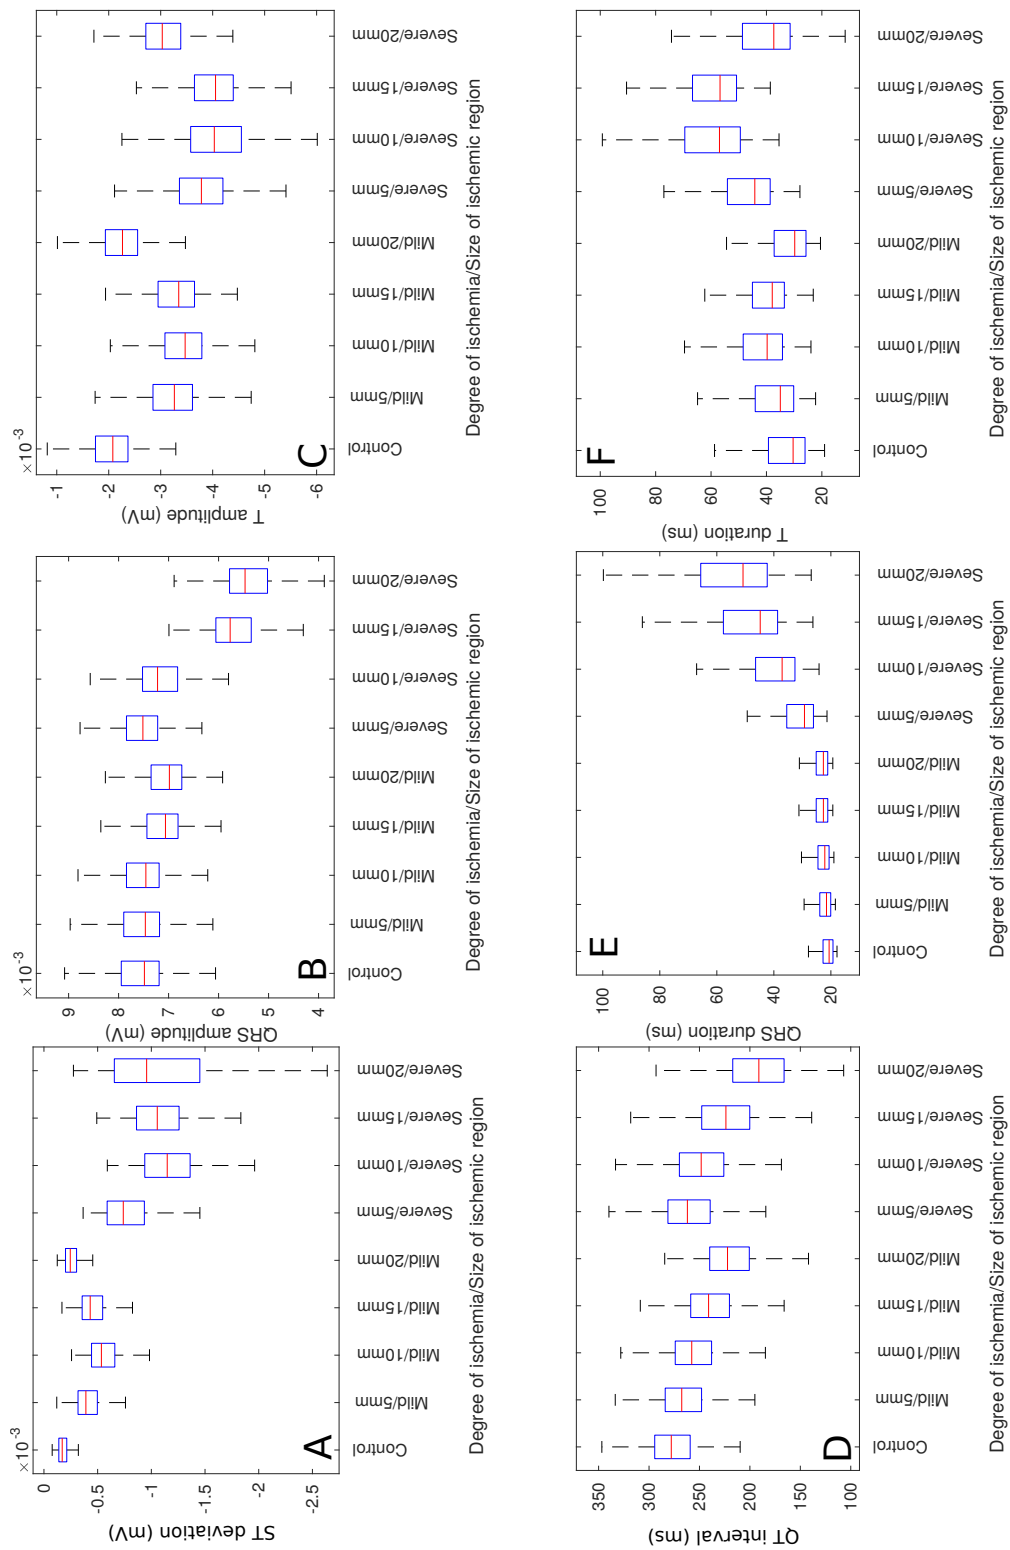

**Fig 2. Pseudo-ECG biomarkers of TP06 cables of cells as a function of the size of the ischemic region.** (A) ST deviation, (B) QRS amplitude, (C) T wave amplitude, (D) QT interval, (E) QRS complex duration, (F) T wave duration.

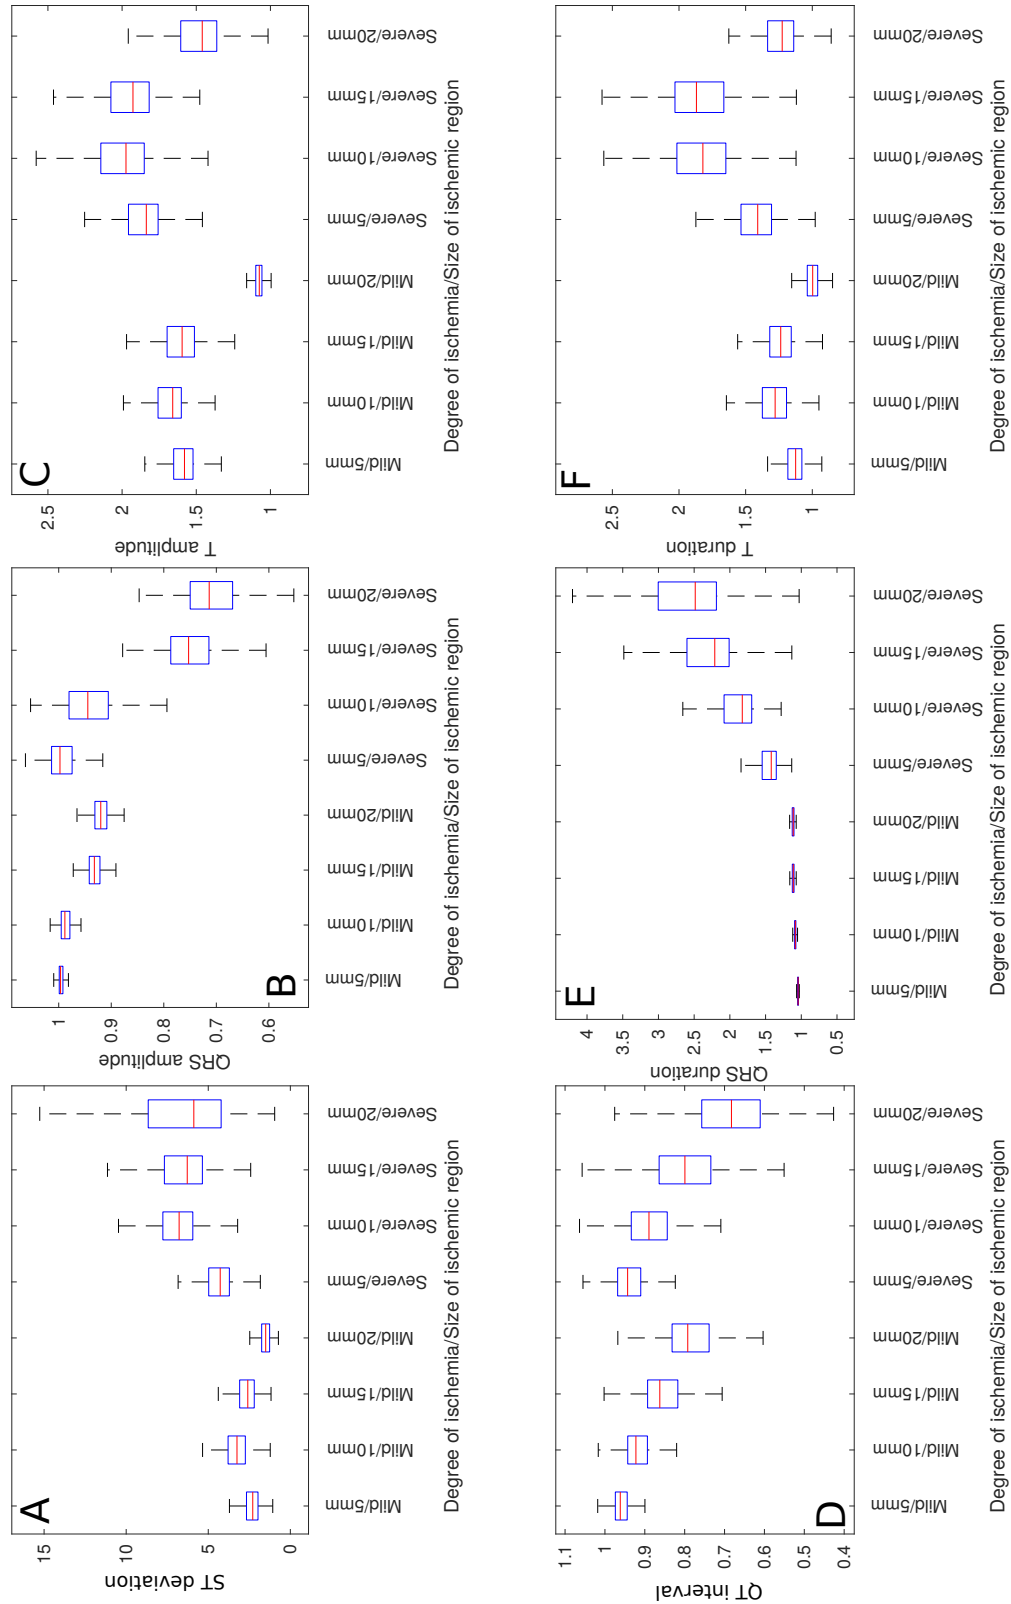

**Fig 3. Ratio of change of pseudo-ECG biomarkers of TP06 cables of cells as a function of the size of the ischemic region. (A) ST deviation, (B) QRS amplitude, (C) T wave amplitude, (D) QT interval, (E) QRS complex duration, (F) T wave duration.**
